# Supplementary material for: Calpain activity is negatively regulated by a KCTD7–Cullin-3 complex via non-degradative ubiquitination
Source: PubMed Central journal article supplement (PMC10038992; doi:10.1038/s41421-023-00533-3), 2023-03-24
Supplement: 41421_2023_533_MOESM1_ESM.pdf [file 41421_2023_533_MOESM1_ESM.pdf]

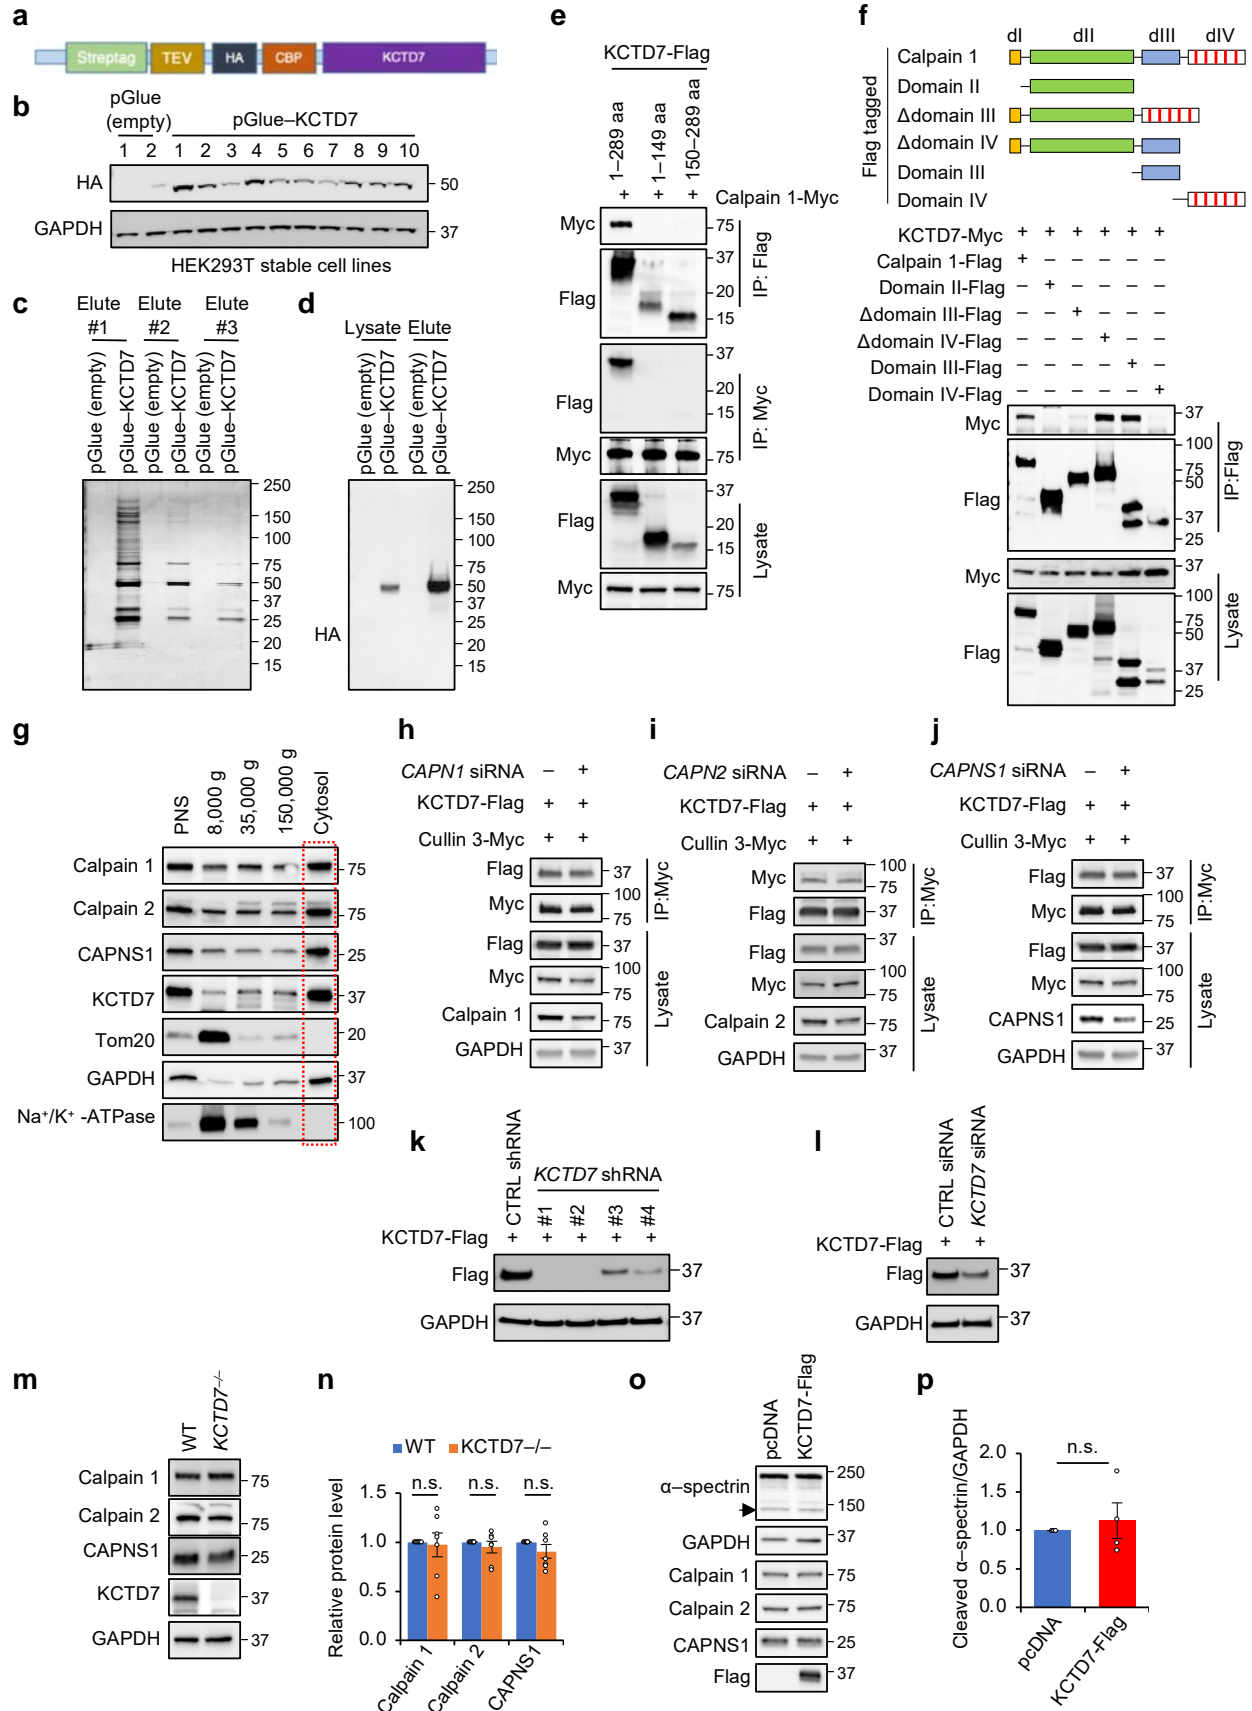

**Fig. S1: Interaction of KCTD7 with Cullin-3 and calpains.** **a**, Schematic representation of the pGLUE-KCTD7 expression vector. Shown are the streptavidin-(streptag) and calmodulin-(CBP) binding affinity tags placed in tandem, along with an HA epitope for protein detection, placed at the N-terminus of full length human KCTD7. **b**, Immunoblot analysis of HEK293 cell clones stably expressing pGLUE-KCTD7 using  $\alpha$ -HA antibody. **c**, Silver staining gel analysis of affinity purified proteins. **d**, Immunoblot analysis of affinity purified proteins using  $\alpha$ -HA antibody to detect KCTD7. **e**, Co-IP analysis of KCTD7 deletion constructs and calpain 1-Myc in HEK293 cells. **f**, Co-IP analysis of calpain 1 deletion constructs and KCTD7-Myc in HEK293 cells. **g**, Western blot analysis of subcellular fractions of HeLa cell lysates after differential velocity centrifugation. Equal amounts of protein from each fraction were separated by SDS-PAGE. **h-j**, Calpain 1 (h), calpain 2 (i), and CAPNS1 (j) were knocked down in HEK293 cells and, 24 h later, cells were transfected with plasmids expressing KCTD7 and Cullin-3 for 48 h. Shown are co-IP analyses of KCTD7 and Cullin-3 in the tested conditions. **k, l**, Evaluation of shRNAs and siRNAs for KCTD7. KCTD7-Flag was transfected in HEK293 cells and, 24 h later, cells were transfected with the indicated shRNAs (k) or siRNAs (l) for 48 h. Cell lysates were immunoblotted to detect KCTD7 expression using  $\alpha$ -Flag antibody. **m, n**, Immunoblot analysis of KCTD7 knock-out HeLa cells. **o, p**, KCTD7-Flag was expressed in HEK293 cells for 36 h and  $\alpha$ -spectrin cleavage was evaluated by immunoblotting using  $\alpha$ -spectrin antibody. Data represent mean  $\pm$  SEM,  $n = 3$ ; \* $P < 0.05$ , \*\* $P < 0.01$ , \*\*\* $P < 0.0001$ , ns = not significant.

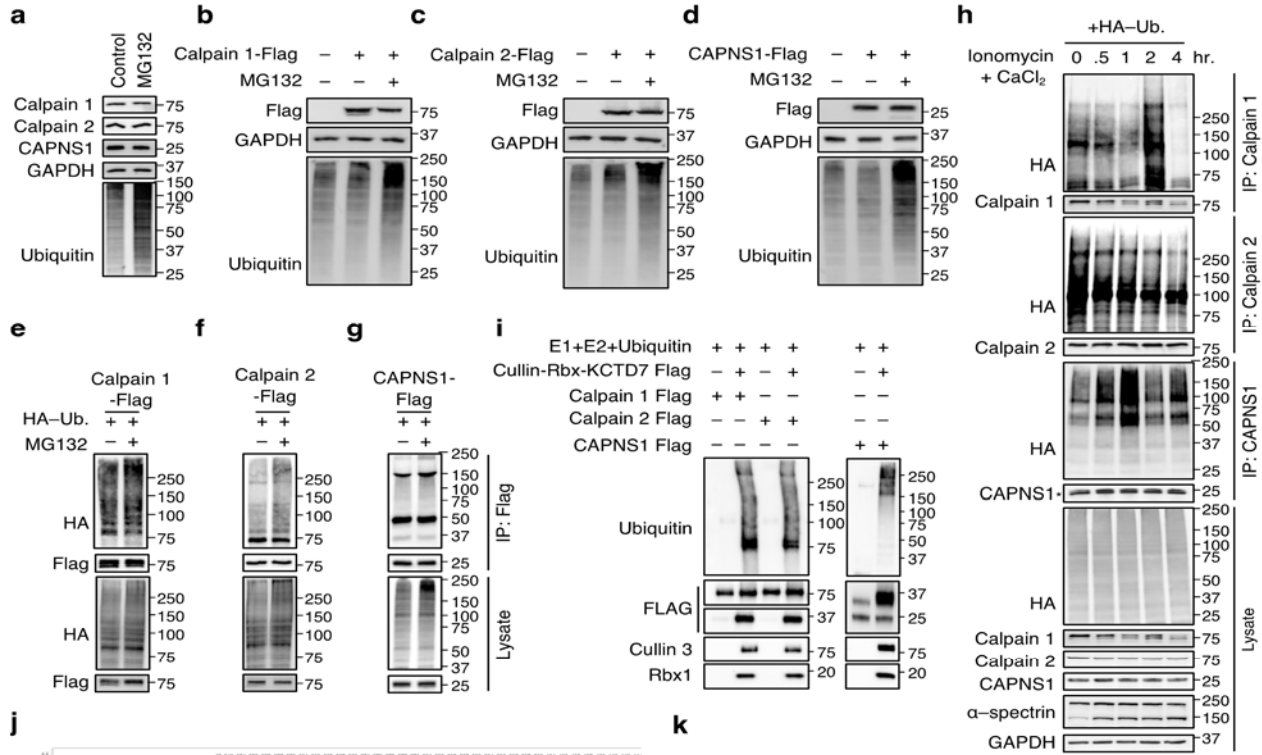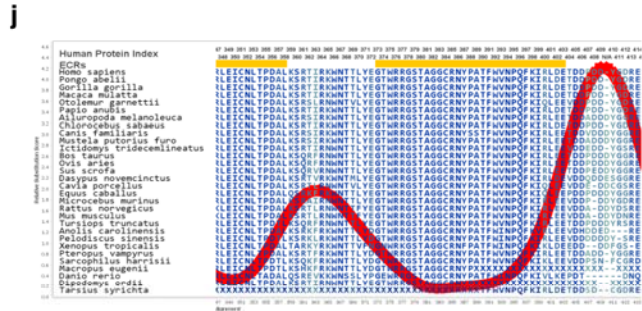

**l**

| Gene name | GlyGly (K) site | GlyGly (K) Probabilities | Sequence window                    | n=1   |       | n=2   |       |
|-----------|-----------------|--------------------------|------------------------------------|-------|-------|-------|-------|
|           |                 |                          |                                    | pcDNA | KCTD7 | pcDNA | KCTD7 |
| CAPNS1    | 398             | NYPATFWVNPQF(K)IR        | GCRNYPATFWVNPQFKIRLDEDDP<br>DDYGDR | 0     | 68607 | 0     | 40721 |

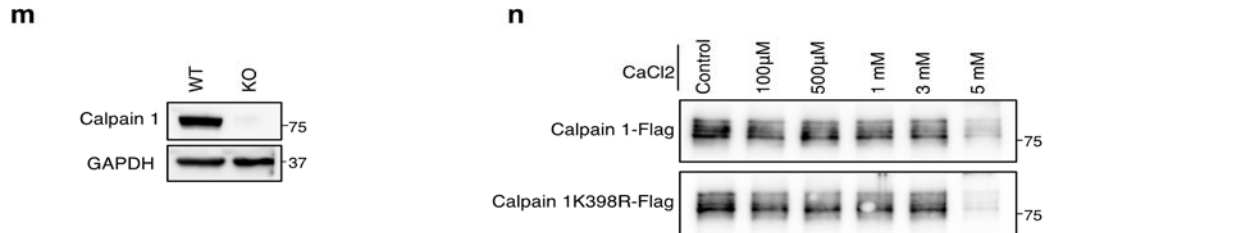

Sup. 2

**Fig. S2: Calpains are regulated via ubiquitin-mediated modification.** **a**, Immunoblot analysis of HEK293 cells treated with MG132 (10  $\mu$ M) or vehicle for 4 h using antibodies for calpain 1, calpain 2, and CAPNS1. GAPDH was used as a loading control. **b-d**, Immunoblot analysis of HEK293 cells expressing calpain 1 (b), calpain 2 (c), or CAPNS1 (d) and treated with MG132 (10  $\mu$ M) or vehicle for 4 h before protein collection. GAPDH was used as a loading control. **e-g**, In vivo ubiquitination assay for calpain1 (e), calpain 2 (f), and CAPNS1 (g) performed by coexpressing either protein with HA-Ub in HEK293 cells for 36 h and treating with MG132 (10  $\mu$ M) or vehicle for 4 h before protein collection. **h**, In vivo ubiquitination assay for calpain1, calpain 2, and CAPNS1 performed after treatment with 1  $\mu$ M Ionomycin along with 5 mM CaCl<sub>2</sub> for the indicated times. The lysates were also blotted for  $\alpha$ -spectrin to evaluate calpain activity. **i**, In vitro ubiquitination assay of calpain 1, calpain 2, and CAPNS1. **j**, Evolutionarily constrained region analysis of calpain1. Shown is a multi-alignment of calpain1 protein sequences along with a plot of local evolutionary rates. Evolutionarily constrained regions (ECRs) are indicated with yellow lines. **k-l**, Mass spectrometry data of enzymatic digested peptides from CAPN1-Flag was acquired on nanoElute coupled to a timsTOF Pro2 Mass Spectrometer and analyzed using MaxQuant v2.1.0.0. The ubiquitination site of CAPN1-Flag on K398 is highlighted and shown on the peptide sequence. Trypsin digestion of ubiquitin conjugates generates a diGly tag that is formed at the ubiquitinated lysine residue. **m**, Immunoblot analysis of calpain 1 knock out HeLa cells. **n**, Immunoblot analysis of calpain autolysis by incubating Flag tagged WT calpain 1 or calpain 1-K398R immunopurified proteins, from HEK293 cells, with indicated calcium concentrations.

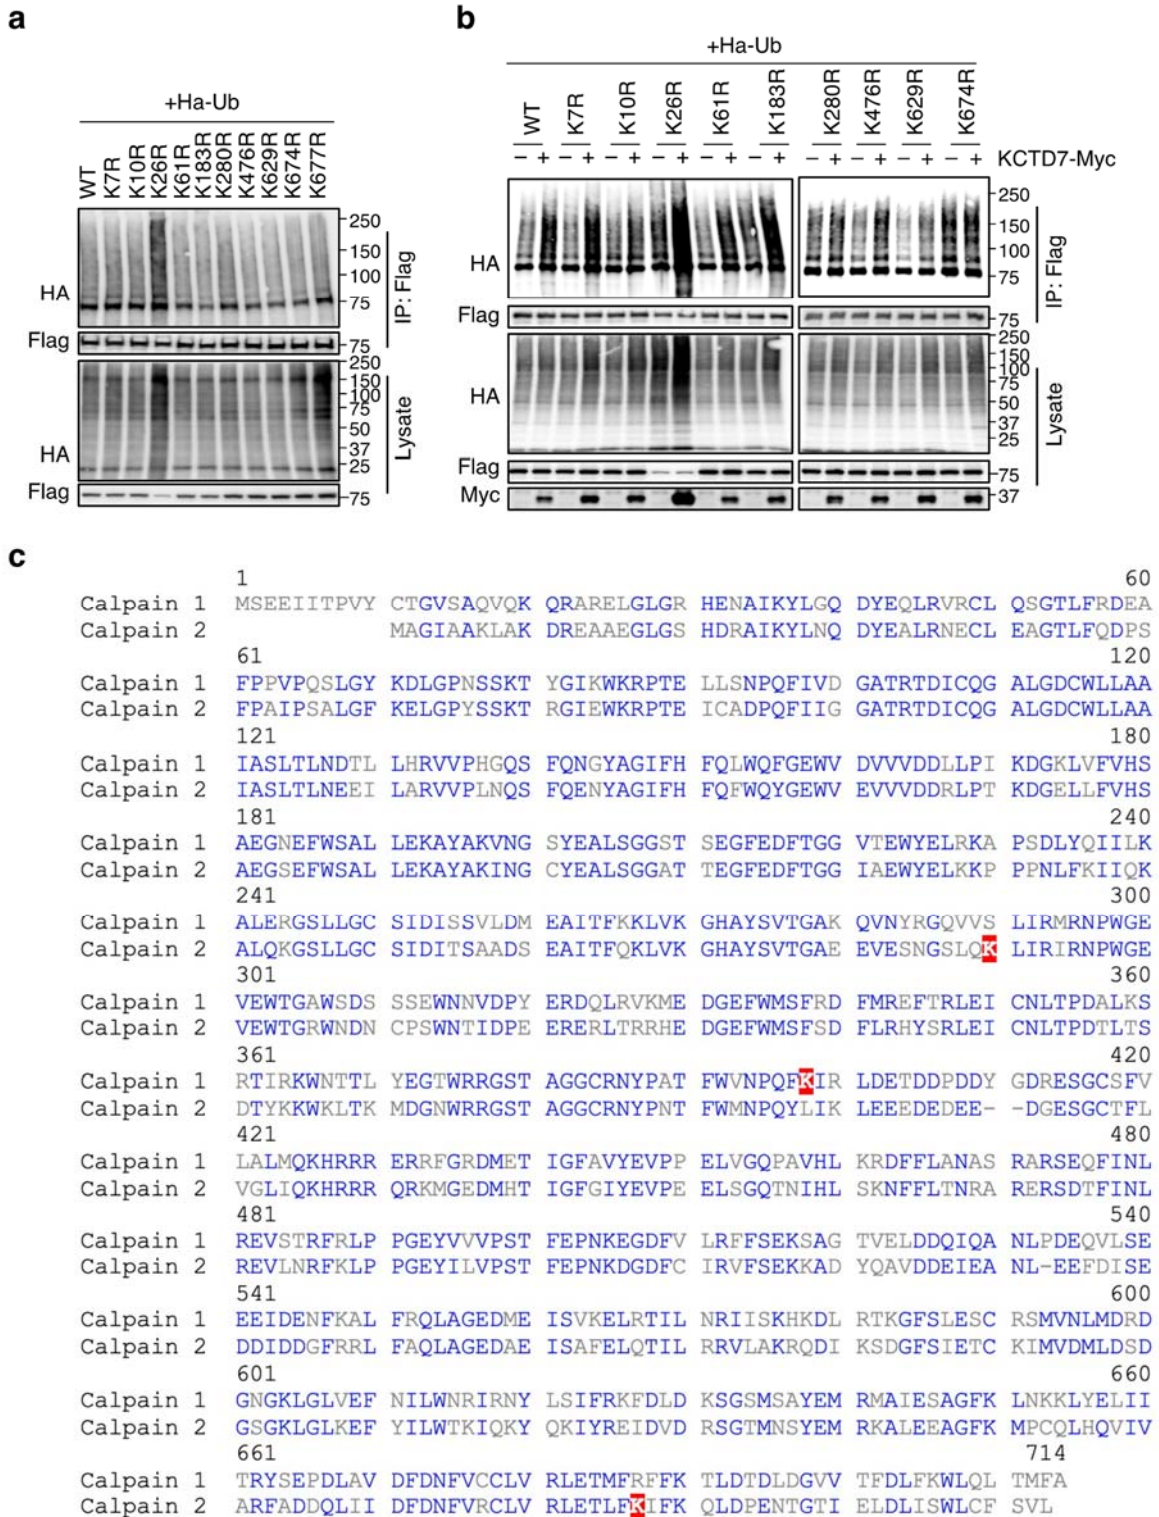

**Fig. S3: Determination of KCTD7 mediated ubiquitination site in calpain 2. a**, In vivo

ubiquitination assay in HEK293 cells for calpain 2 K—R mutants. **b**, In vivo ubiquitination assay

for calpain2 K—R mutants performed with or without KCTD7 in HEK293 cells. **c**, Multiple alignment of calpain 1 and calpain 2 proteins. Lysine residues ubiquitinated by KCTD7 are highlighted.



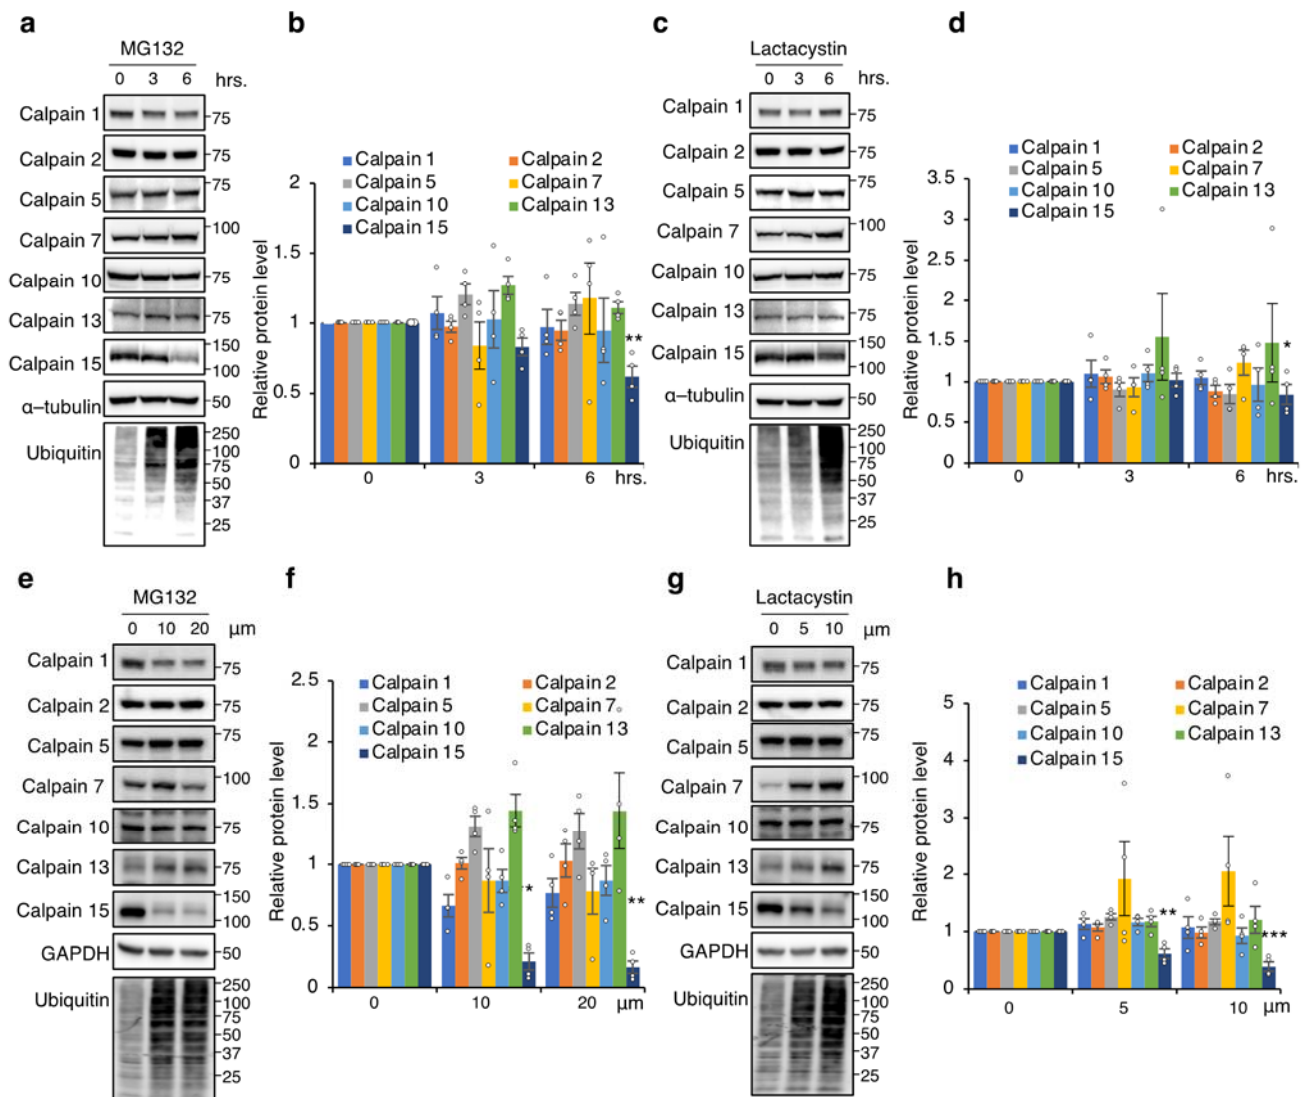

**Fig. S4: Calpains are regulated via ubiquitin-mediated modification.** **a, b**, Immunoblot analysis of HEK293 cells treated with MG132 (10 μM) or vehicle using antibodies for ubiquitous expressing calpains. **c, d**, Immunoblot analysis of HEK293 cells treated with lactacystin (20 μM) or vehicle using antibodies for ubiquitous expressing calpains. **e, f**, Immunoblot analysis of HEK293 cells treated with MG132 or vehicle for 24 h using antibodies for ubiquitous expressing calpains. **g, h**, Immunoblot analysis of HEK293 cells treated with lactacystin or vehicle for 24 h using antibodies for ubiquitous expressing calpains. Data represent mean ± SEM,  $n = 5$ ; \* $P < 0.05$ , \*\* $P < 0.01$ , \*\*\* $P < 0.0001$ , ns = not significant.

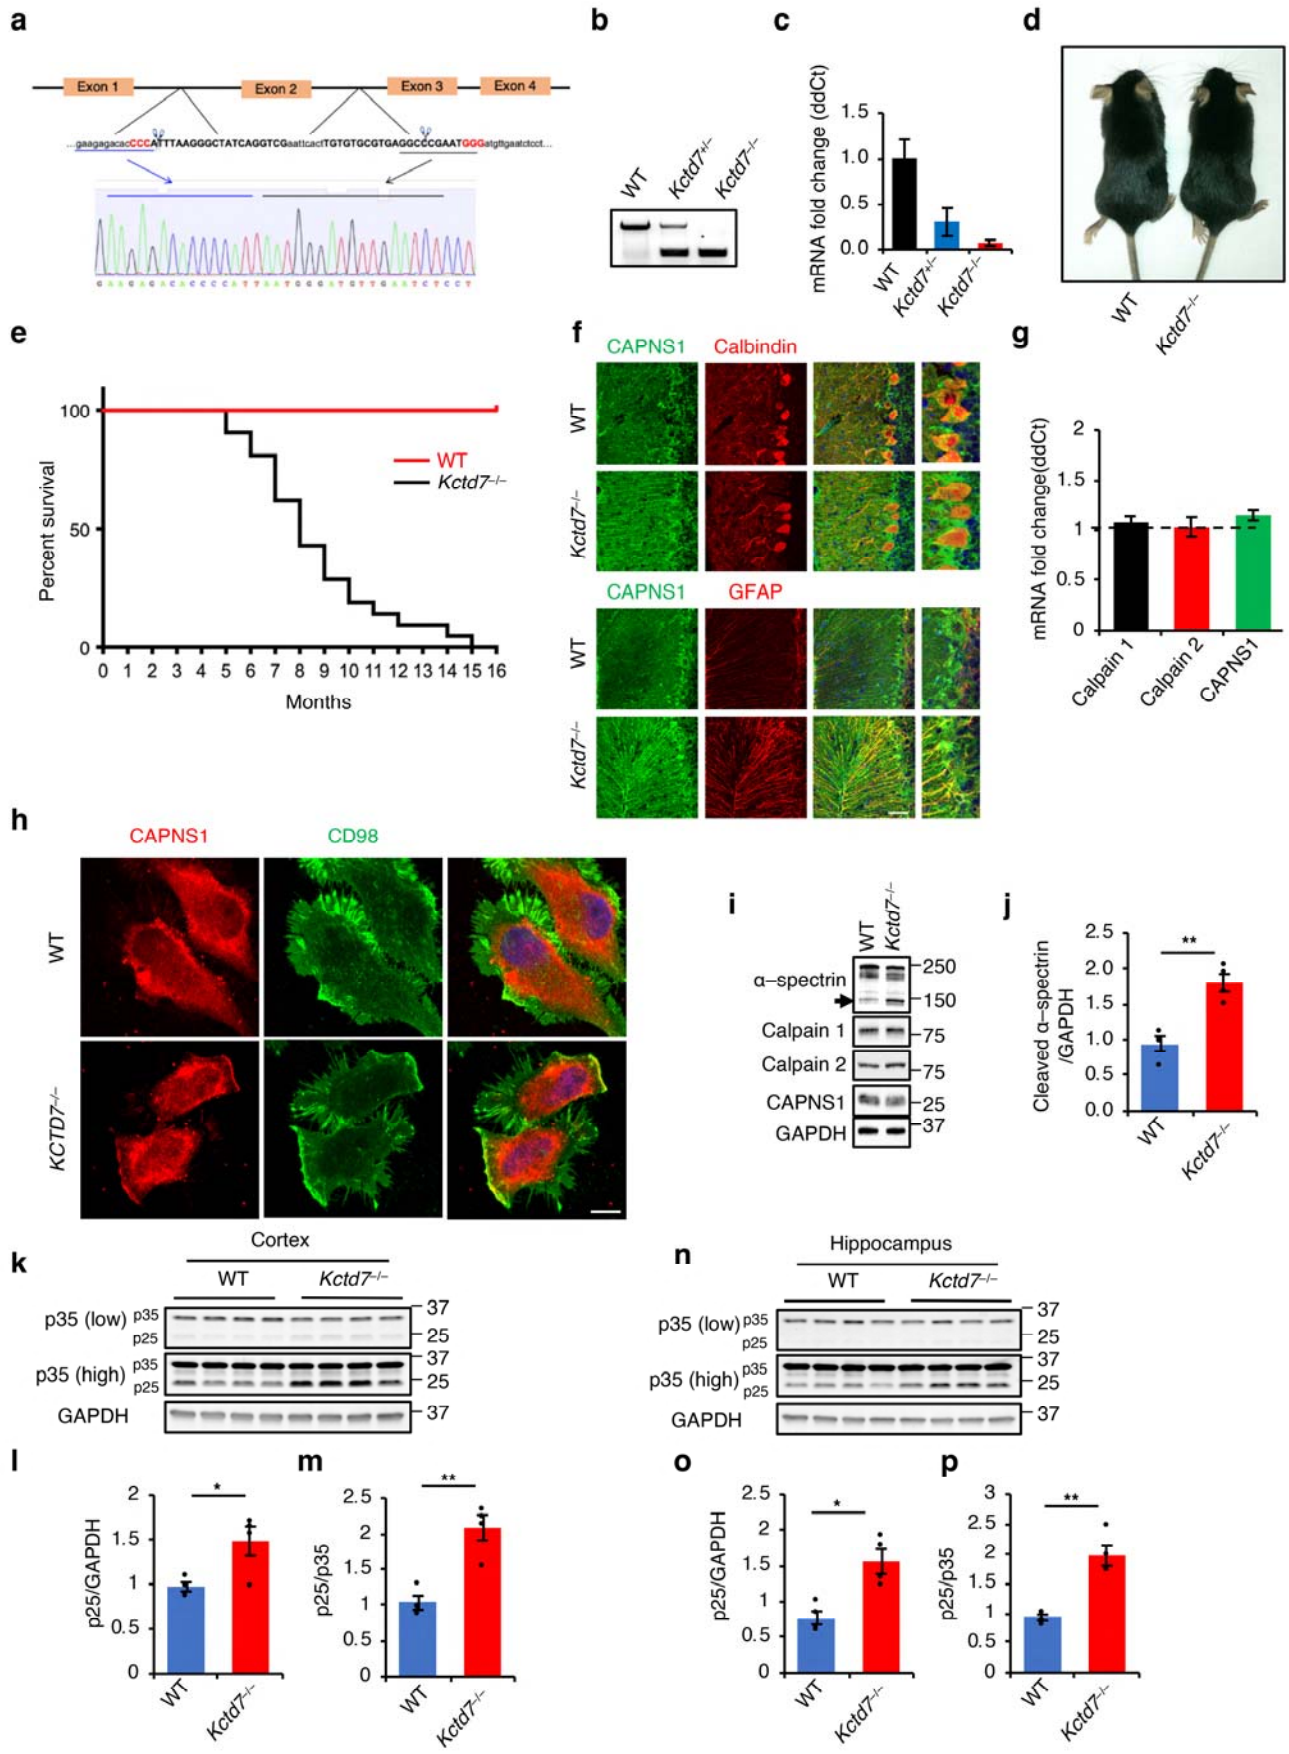



**Fig. S5: Generation of a *Kctd7*<sup>-/-</sup> mouse line using CRISPR/Cas9 technology.** **a**, Two gRNAs were designed to cut both ends of exon 2 of the *KCTD7* gene. **b**, Agarose gel electrophoresis analysis of PCR products using genomic DNA from a WT mouse and heterozygous (*Kctd7*<sup>+/-</sup>) and homozygous (*Kctd7*<sup>-/-</sup>) mice from the selected *Kctd7*<sup>-/-</sup> mouse line. **c**, RT-qPCR analysis of mRNAs extracted from WT, *Kctd7*<sup>+/-</sup> and *Kctd7*<sup>-/-</sup> mouse brain homogenates showing transcriptional levels of *Kctd7* ( $n = 3$  per genotype). **d**, Representative pictures of 5-week-old WT and *Kctd7*<sup>-/-</sup> mice. **e**, Survival curve of *Kctd7*<sup>-/-</sup> mice (median lifespan = 9 months;  $n = 22$  for WT mice,  $n = 20$  for *Kctd7*<sup>-/-</sup> mice). **f**, Confocal microscopy of 5-week-old WT and *Kctd7*<sup>-/-</sup> mouse cerebellum showing CAPNS1 localization in Purkinje cells and astrocytes.  $\alpha$ -calbindin and  $\alpha$ -GFAP antibodies were used to mark Purkinje cells and astrocytes, respectively. **g**, RT-qPCR analysis of mRNAs extracted from 5-week-old WT and *Kctd7*<sup>-/-</sup> mouse brain homogenates showing no differences in transcriptional levels of calpain 1, calpain 2, and CAPNS1 ( $n = 3$  per genotype). **h**, Confocal microscopy analysis of CAPNS1 localization in WT or *KCTD7* knock-out HeLa cells. CD98 was used as a plasma membrane marker. Scale bar, 10  $\mu$ m. **i**, **j**, Four-week-old astrocyte cultures were lysed in RIPA buffer and  $\alpha$ -spectrin cleavage was evaluated by immunoblotting. **k-p**, Cortical and hippocampal lysates from 5-week-old WT and *Kctd7*<sup>-/-</sup> mice were lysed in NP-40 lysis buffer and immunoblotted for p35 to evaluate calpain-mediated cleavage. Data represent mean  $\pm$  SEM, ( $n = 4$  per genotype); \* $P < 0.05$ , \*\* $P < 0.01$ , \*\*\* $P < 0.0001$ , ns = not significant.

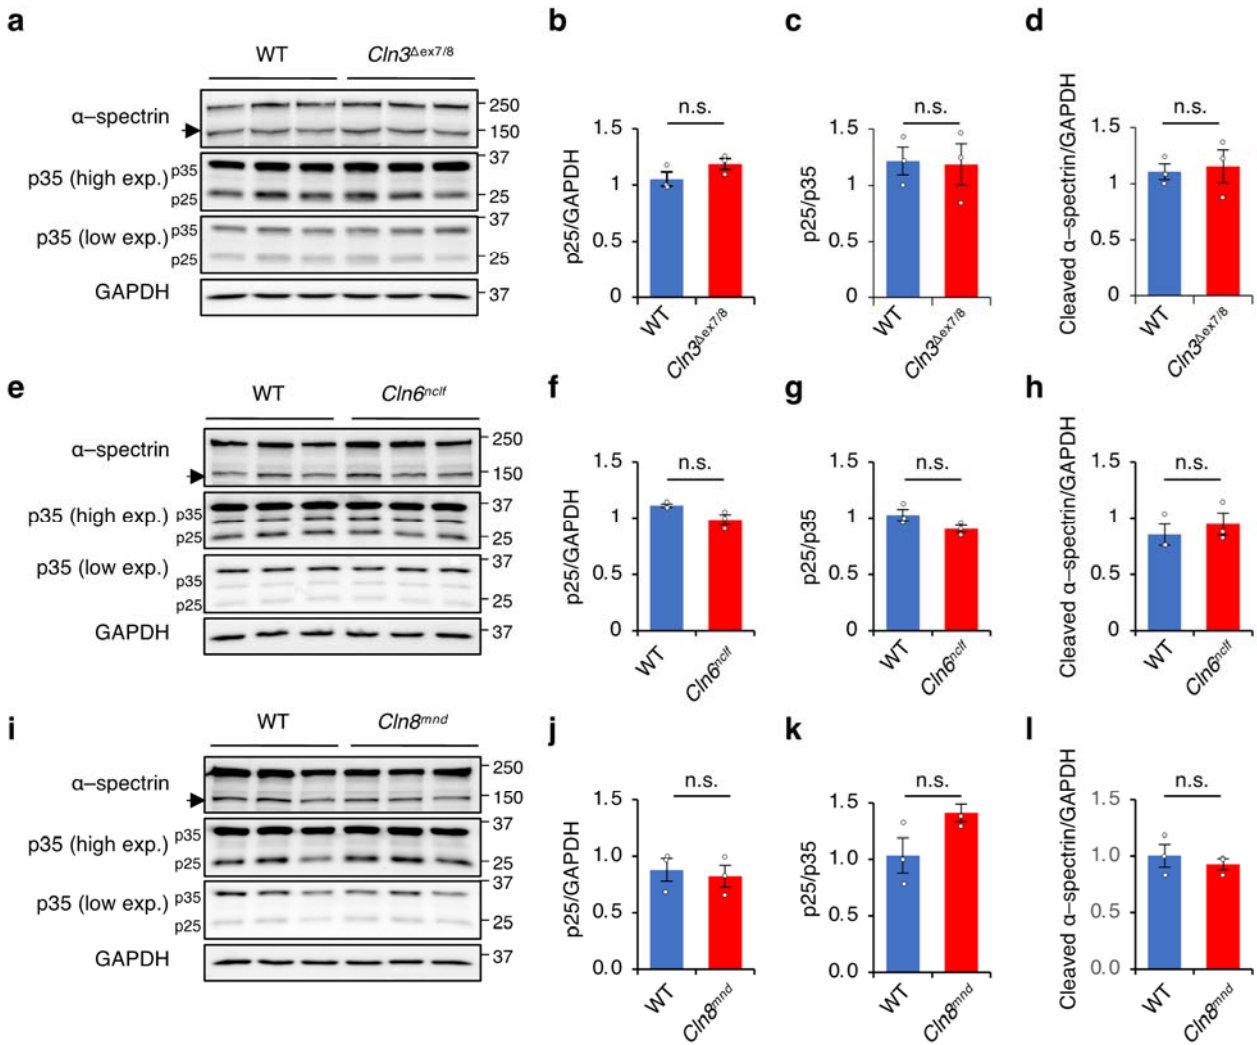

**Fig. S6: Analysis of calpain activity in various mouse models of NCL. a-l,** Calpain activity was evaluated in *Cln3<sup>Δex7/8</sup>* mice (a-d), *Cln6<sup>ncfl</sup>* mice (e-h), and *Cln8<sup>mnd</sup>* mice (i-l) by performing immunoblot analysis of whole brain lysates collected at 2-3 months of age with antibodies for α-spectrin and p35. GAPDH was used as a loading control.  $n = 3$  per genotype. Data represent mean  $\pm$  SEM; \* $P < 0.05$ , \*\* $P < 0.01$ , \*\*\* $P < 0.0001$ , ns = not significant.

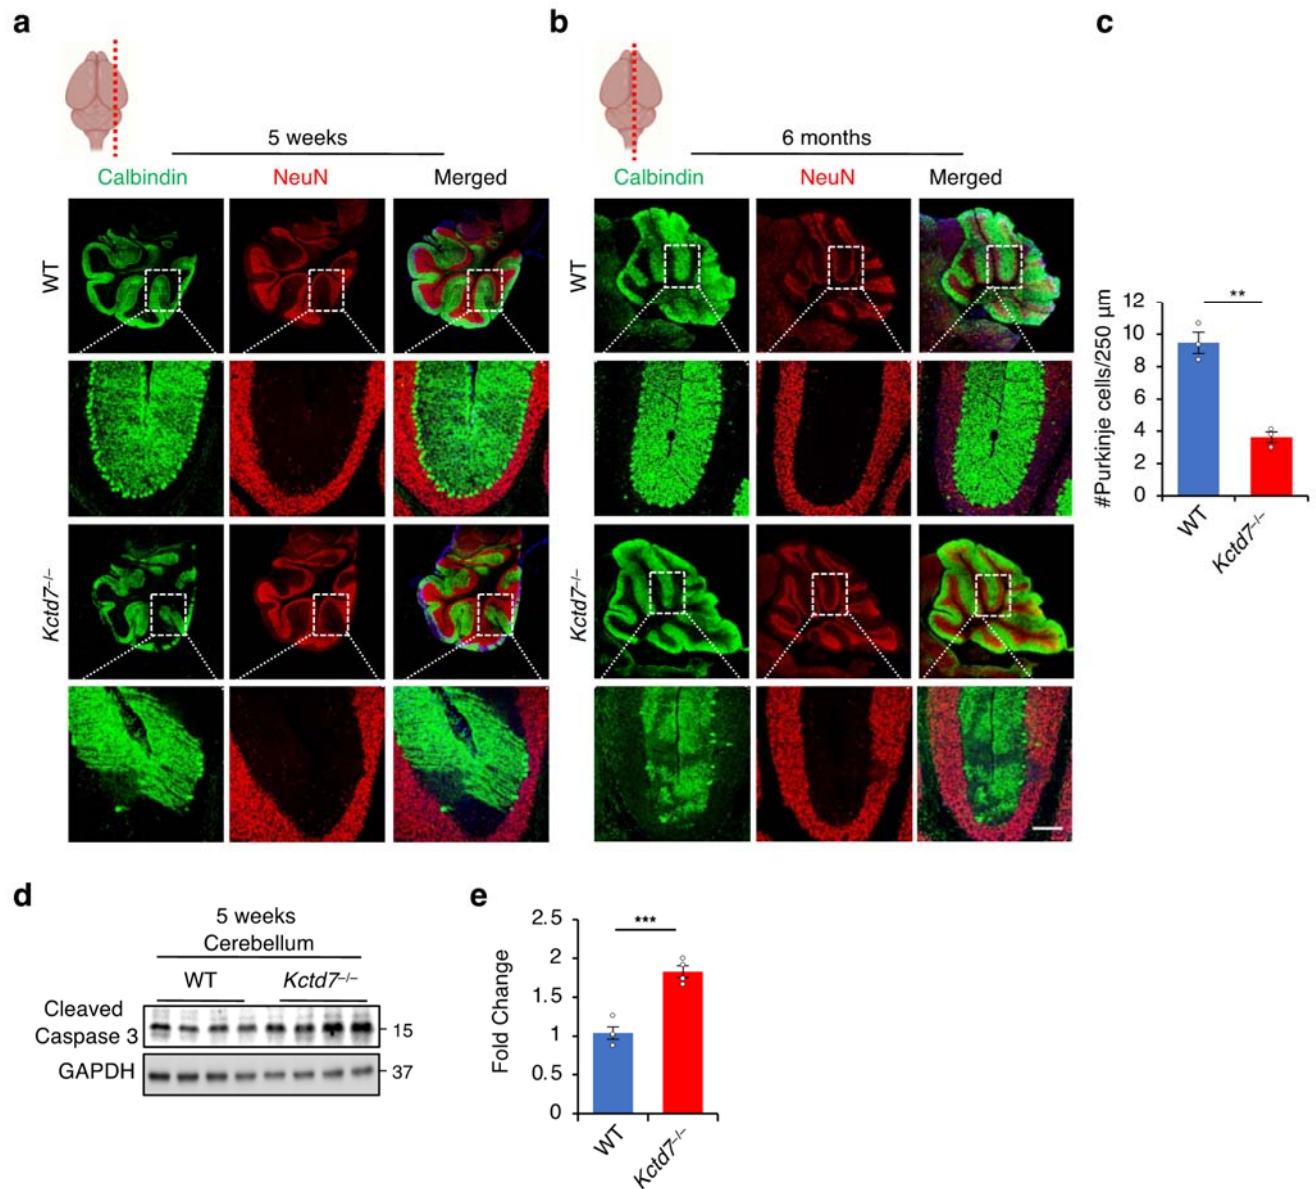

**Fig. S7: KCTD7 deficiency leads to neurodegeneration.** **a-c**, Confocal microscopy analysis of the cerebellum from 5-week-old and 6-month-old WT and *Kctd7<sup>-/-</sup>* mice.  $\alpha$ -calbindin antibody was used to label Purkinje cells. Scale bars, 200  $\mu$ m. Quantification of Purkinje cell numbers in 6-month-old animals shown in (c),  $n = 5$  per genotype. Scale bars, 200  $\mu$ m. **d**, **e**, Immunoblot analysis of cerebellar tissue from 5-week-old WT and *Kctd7<sup>-/-</sup>* mice using cleaved caspase 3 antibody. Data represent mean  $\pm$  SEM,  $n = 4$ ; \* $P < 0.05$ , \*\* $P < 0.01$ , \*\*\* $P < 0.0001$ , ns = not significant.

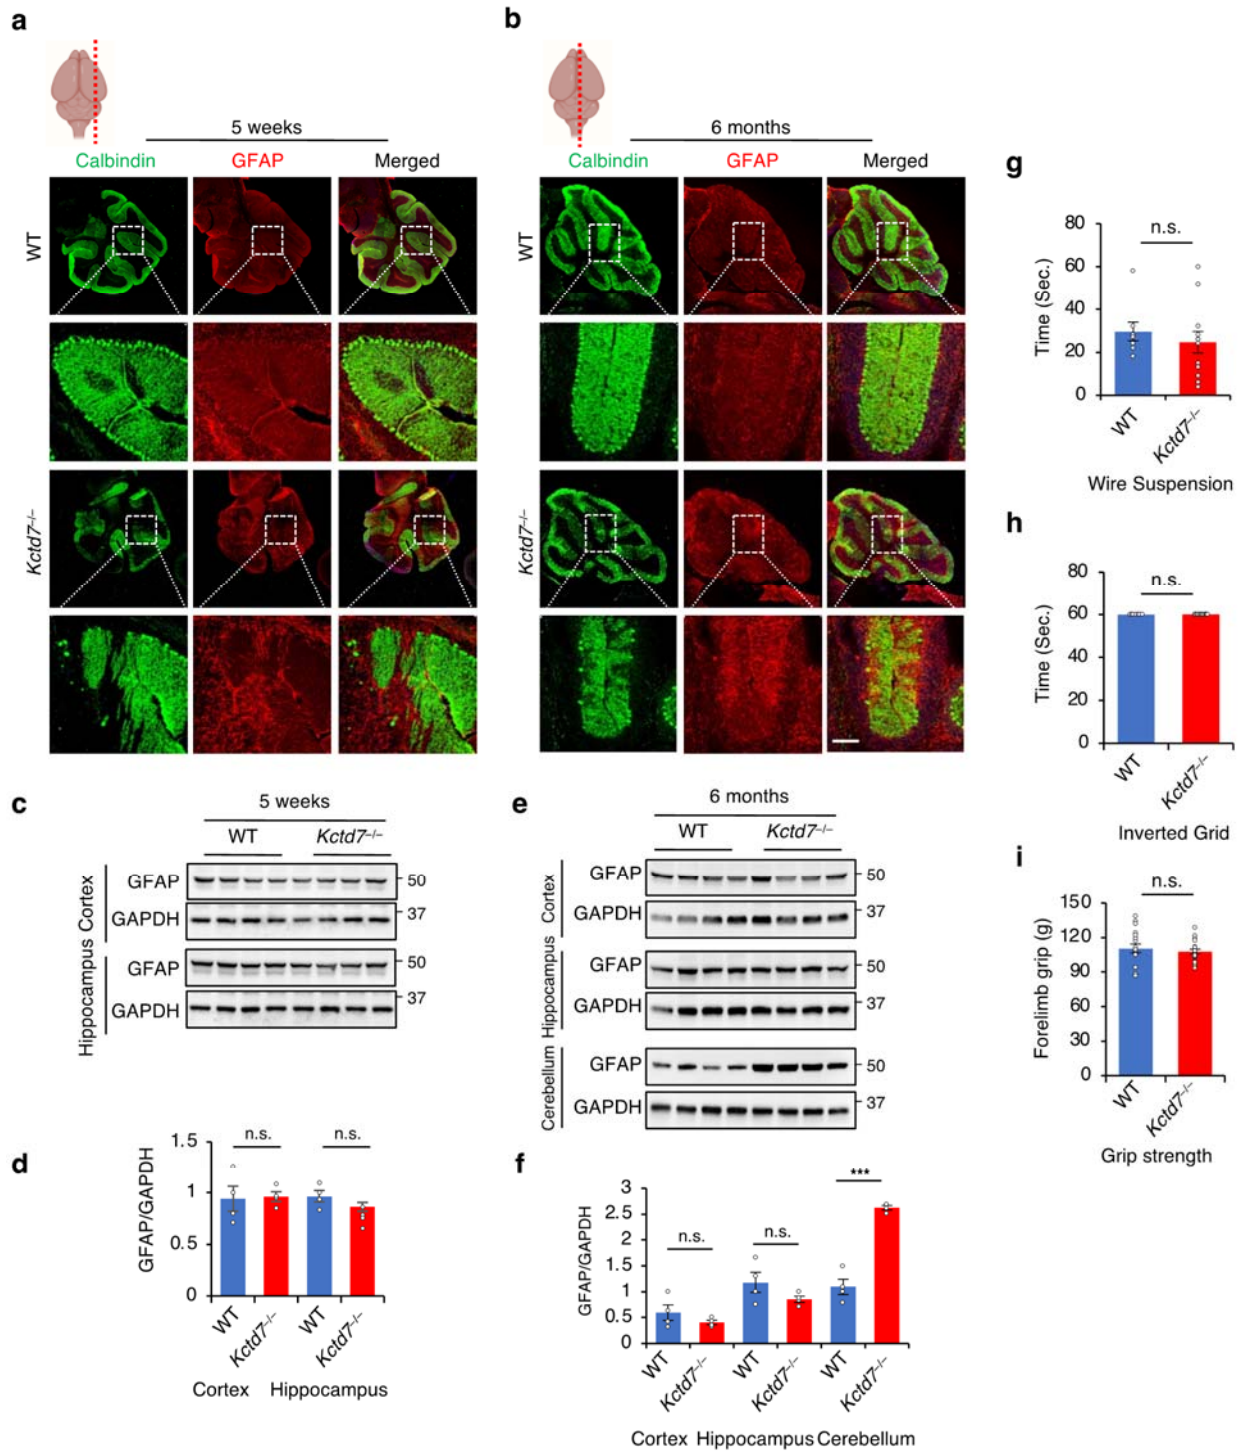

**Fig. S8: KCTD7 deficiency leads to neurodegeneration and behavioral impairments. a, b,** Confocal microscopy analysis of the cerebellum from 5-week-old and 6-month-old WT and *Kctd7*<sup>-/-</sup> mice.  $\alpha$ -GFAP antibody was used to label astrocytes. **c, d,** Immunoblot analysis of

cortical and hippocampal tissue from 5-week-old WT and *Kctd7*<sup>-/-</sup> mice using  $\alpha$ -GFAP antibody. GAPDH is used as a loading control. **e, f**, Immunoblot analysis of cortical, hippocampal, and cerebellar tissue from 6-month-old WT and *Kctd7*<sup>-/-</sup> mice using  $\alpha$ -GFAP antibody. GAPDH is used as a loading control. **g, h**, WT and *Kctd7*<sup>-/-</sup> mice were assessed for latency to fall in a wire suspension test (**g**) and inverted grid tests (**h**) at 10 weeks of age.  $n = 10$  for WT mice;  $n = 16$  for *Kctd7*<sup>-/-</sup> mice. **i**, WT and *Kctd7*<sup>-/-</sup> mice were assessed for grip strength in a forepaw grip strength at 10 weeks of age using a digital force gauge.  $n = 10$  for WT mice;  $n = 16$  for *Kctd7*<sup>-/-</sup> mice. Data represent mean  $\pm$  SEM. \* $P < 0.05$ , \*\* $P < 0.01$ , \*\*\* $P < 0.0001$ , ns = not significant.



**Supplementary Table 1. List of KCTD7-interacting proteins as detected by LC-MS/MS.**

| <b>Accession No.</b> | <b>Name</b>                                                                   | <b>No. Peptides</b> |
|----------------------|-------------------------------------------------------------------------------|---------------------|
|                      | <i>Replicate #1</i>                                                           |                     |
| gi 825635            | calmodulin                                                                    | 634                 |
| gi 62897129          | heat shock 70kDa protein 8 isoform 1 variant                                  | 143                 |
| gi 18088719          | Tubulin, beta                                                                 | 102                 |
| gi 269784642         | BTB/POZ domain-containing protein KCTD7 isoform 2                             | 82                  |
| gi 297691739         | Tubulin alpha-1B chain isoform 2                                              | 51                  |
| gi 111305821         | Valosin-containing protein                                                    | 19                  |
| gi 187281            | M4 protein                                                                    | 19                  |
| gi 4502565           | calpain small subunit 1                                                       | 48                  |
| gi 302129652         | annexin A6 isoform 2                                                          | 19                  |
| gi 20149594          | heat shock protein HSP 90-beta                                                | 17                  |
| gi 62897075          | heat shock 70kDa protein 9B precursor variant                                 | 17                  |
| gi 3139079           | cullin 3                                                                      | 10                  |
| gi 47115317          | VIM                                                                           | 8                   |
| gi 6682361           | talin                                                                         | 9                   |
| gi 119619622         | reticulocalbin 2, EF-hand calcium binding domain                              | 8                   |
| gi 375314781         | keratin 1                                                                     | 8                   |
| gi 28277071          | Importin 5                                                                    | 11                  |
| gi 5107666           | Chain A, Structure Of Importin Beta Bound To The Ibb Domain Of Importin Alpha | 8                   |
| gi 19111150          | angiominin isoform 2                                                          | 8                   |
| gi 48145697          | CPNE1                                                                         | 8                   |
| gi 62897625          | beta actin variant                                                            | 8                   |
| gi 49168528          | ANXA5                                                                         | 9                   |
| gi 62898293          | programmed cell death 6 variant                                               | 6                   |
| gi 5734603           | KARP-1-binding protein 2 (KAB2)                                               | 6                   |
| gi 31221             | protein serine/threonine kinase                                               | 8                   |
| gi 38571606          | Ribosomal protein L23                                                         | 7                   |
| gi 9963810           | NRAGE                                                                         | 5                   |
| gi 662841            | heat shock protein 27                                                         | 12                  |
| gi 48145673          | HNRPH1                                                                        | 6                   |
| gi 73915357          | Protein transport protein Sec16A;                                             | 5                   |
| gi 12017959          | C1orf28                                                                       | 6                   |
| gi 49065418          | BAG2                                                                          | 9                   |
| gi 119596821         | myosin light chain kinase 2, skeletal muscle, isoform CRA_b                   | 13                  |
| gi 68533039          | DSP variant protein                                                           | 4                   |
| gi 31544959          | TRIM28 protein                                                                | 4                   |
| gi 40788339          | KIAA0723 protein                                                              | 4                   |

|              |                                                                                                     |   |
|--------------|-----------------------------------------------------------------------------------------------------|---|
| gi 62089432  | DnaJ (Hsp40) homolog, subfamily A, member 3 variant                                                 | 4 |
| gi 78042577  | MAP7 domain-containing protein 1                                                                    | 3 |
| gi 158256510 | unnamed protein product                                                                             | 5 |
| gi 62089254  | DnaJ (Hsp40) homolog, subfamily C, member 7 variant                                                 | 3 |
| gi 18105007  | CAD protein                                                                                         | 4 |
| gi 62898934  | DnaJ (Hsp40) homolog, subfamily B, member 6 isoform a variant                                       | 3 |
| gi 56122599  | leukemia multidrug resistance associated protein                                                    | 4 |
| gi 187609788 | truncated plakophilin-2                                                                             | 3 |
| gi 119617041 | keratin 5 (epidermolysis bullosa simplex, Dowling-Meara/Kobner/Weber-Cockayne types), isoform CRA_d | 3 |
| gi 8925970   | eIF4E-transporter                                                                                   | 3 |
| gi 49168458  | DNAJB1                                                                                              | 3 |
| gi 904032    | p48                                                                                                 | 3 |
| gi 119600190 | ribosomal protein L24, isoform CRA_e                                                                | 4 |
| gi 9246427   | RNA helicase A binding protein 95                                                                   | 3 |
| gi 88759348  | RING finger protein 219                                                                             | 4 |
| gi 63252886  | prolyl 4-hydroxylase subunit alpha-1 isoform 1 precursor                                            | 2 |
| gi 310750364 | ensconsin isoform 6                                                                                 | 2 |
| gi 62896517  | ribosomal protein S4, X-linked X isoform variant                                                    | 2 |
| gi 62088004  | EGF-containing fibulin-like extracellular matrix protein 1 isoform b variant                        | 2 |
| gi 790817    | microfibril-associated glycoprotein 4, partial                                                      | 4 |
| gi 62897071  | oxygen regulated protein precursor variant                                                          | 2 |
| gi 453155    | keratin 9                                                                                           | 2 |
| gi 62896605  | eukaryotic translation elongation factor 1 alpha 1 variant                                          | 2 |
| gi 169159111 | tubulin tyrosine ligase-like family, member 12                                                      | 2 |
| gi 8394343   | sperm surface protein Sp17                                                                          | 2 |
| gi 62896539  | chaperonin containing TCP1, subunit 8 (theta) variant                                               | 2 |
| gi 71891685  | KIAA0829 protein                                                                                    | 2 |
| gi 340026    | tyrosine kinase, partial                                                                            | 2 |
| gi 253735647 | HsMcm7                                                                                              | 2 |
| gi 3088356   | ribosomal protein L38                                                                               | 2 |
| gi 71533987  | General transcription factor II, i                                                                  | 2 |
| gi 197692147 | T-complex protein 1 subunit beta                                                                    | 2 |
| gi 42476299  | PERQ amino acid-rich with GYF domain-containing protein 2 isoform b                                 | 3 |
| gi 23242517  | Copine III                                                                                          | 4 |
| gi 317373596 | Calpain-2 catalytic subunit                                                                         | 2 |
| gi 12804313  | Similar to expressed sequence 2 embryonic lethal, partial                                           | 2 |
| gi 397524998 | Tescalcin isoform 1                                                                                 | 2 |
| gi 61656607  | tumor rejection antigen (gp96) 1                                                                    | 3 |
| gi 45709422  | Karyopherin alpha 2 (RAG cohort 1, importin alpha 1)                                                | 2 |
| gi 5031579   | A-kinase anchor protein 8                                                                           | 2 |

|                     |                                                                                           |     |
|---------------------|-------------------------------------------------------------------------------------------|-----|
| gi 495126           | ribosomal protein L11                                                                     | 2   |
| gi 194390416        | eukaryotic translation initiation factor 3, subunit 7 zeta, 66/67kDa, isoform CRA_b       | 2   |
| gi 119623811        | hCG2005638, isoform CRA_c                                                                 | 2   |
| gi 452269           | glucose-6-phosphate dehydrogenase                                                         | 2   |
| gi 194374093        | unnamed protein product                                                                   | 2   |
| gi 8099630          | protein kinase CDK9                                                                       | 3   |
| gi 49456297         | PRDX4                                                                                     | 2   |
| gi 13661193         | fibulin-1 isoform D precursor                                                             | 2   |
| gi 15147337         | E3 ubiquitin-protein ligase UBR5                                                          | 2   |
| gi 15667255         | calpain small subunit 2                                                                   | 2   |
| gi 643016           | T cell receptor alpha chain Mb11                                                          | 2   |
| <i>Replicate #2</i> |                                                                                           |     |
| gi 825635           | calmodulin                                                                                | 267 |
| gi 62897129         | heat shock 70kDa protein 8 isoform 1 variant                                              | 54  |
| gi 27368062         | class IVb beta tubulin                                                                    | 44  |
| gi 269784642        | BTB/POZ domain-containing protein KCTD7 isoform 2                                         | 68  |
| gi 375314781        | keratin 1                                                                                 | 24  |
| gi 297691739        | tubulin alpha-1B chain isoform 2                                                          | 21  |
| gi 119581085        | keratin 10 (epidermolytic hyperkeratosis; keratosis palmaris et plantaris), isoform CRA_b | 14  |
| gi 28277071         | Importin 5                                                                                | 14  |
| gi 20149594         | heat shock protein HSP 90-beta                                                            | 15  |
| gi 5107666          | Chain A, Structure Of Importin Beta Bound To The Ibb Domain Of Importin Alpha             | 13  |
| gi 302129652        | annexin A6 isoform 2                                                                      | 18  |
| gi 4502565          | calpain small subunit 1                                                                   | 22  |
| gi 89059026         | extracellular signal-regulated kinase-2 splice variant                                    | 11  |
| gi 62898934         | DnaJ (Hsp40) homolog, subfamily B, member 6 isoform a variant                             | 7   |
| gi 15277503         | ACTB protein, partial                                                                     | 8   |
| gi 197101391        | 40S ribosomal protein S3                                                                  | 5   |
| gi 48734966         | Eukaryotic translation elongation factor 1 alpha 1                                        | 7   |
| gi 49065418         | BAG2                                                                                      | 7   |
| gi 14141152         | heterogeneous nuclear ribonucleoprotein M isoform a                                       | 5   |
| gi 119611832        | hCG2027326                                                                                | 6   |
| gi 150439331        | copine I                                                                                  | 5   |
| gi 47115317         | VIM                                                                                       | 6   |
| gi 435476           | cytokeratin 9                                                                             | 7   |
| gi 62088004         | EGF-containing fibulin-like extracellular matrix protein 1 isoform b variant              | 5   |
| gi 18105007         | CAD protein                                                                               | 5   |
| gi 119613655        | calpain 2, (m/II) large subunit, isoform CRA_a                                            | 5   |
| gi 62897075         | heat shock 70kDa protein 9B precursor variant                                             | 6   |

|                     |                                                                                                                   |     |
|---------------------|-------------------------------------------------------------------------------------------------------------------|-----|
| gi 66365795         | Histone cluster 1, H1e                                                                                            | 4   |
| gi 15126735         | Heat shock 27kDa protein 1                                                                                        | 5   |
| gi 20521736         | KIAA1027 protein                                                                                                  | 4   |
| gi 119571370        | hCG1985580, isoform CRA_a                                                                                         | 3   |
| gi 3139079          | cullin 3                                                                                                          | 3   |
| gi 15080163         | DnaJ (Hsp40) homolog, subfamily A, member 3                                                                       | 3   |
| gi 38571606         | Ribosomal protein L23                                                                                             | 3   |
| gi 49456627         | CALU                                                                                                              | 3   |
| gi 3088356          | ribosomal protein L38                                                                                             | 3   |
| gi 62089254         | DnaJ (Hsp40) homolog, subfamily C, member 7 variant                                                               | 3   |
| gi 1916622          | HAX-1                                                                                                             | 4   |
| gi 17391477         | Annexin A5                                                                                                        | 3   |
| gi 119600195        | hCG1777176, isoform CRA_b                                                                                         | 2   |
| gi 119618532        | hCG2016250, isoform CRA_a                                                                                         | 2   |
| gi 60299991         | aging-associated protein 14b                                                                                      | 3   |
| gi 14043538         | MYLK2 protein                                                                                                     | 6   |
| gi 23242517         | Copine III                                                                                                        | 4   |
| gi 194389120        | unnamed protein product                                                                                           | 2   |
| gi 158260761        | unnamed protein product                                                                                           | 3   |
| gi 119619622        | reticulocalbin 2, EF-hand calcium binding domain                                                                  | 2   |
| gi 5174661          | protein S100-A2                                                                                                   | 2   |
| gi 31418053         | CCT8 protein                                                                                                      | 2   |
| gi 116283604        | SPA17 protein                                                                                                     | 2   |
| gi 114306812        | BAT1 protein                                                                                                      | 2   |
| gi 111305821        | Valosin-containing protein                                                                                        | 2   |
| gi 109389365        | glucose-6-phosphate 1-dehydrogenase isoform a                                                                     | 3   |
| gi 386803           | 40-kDa keratin protein, partial                                                                                   | 3   |
| <i>Replicate #3</i> |                                                                                                                   |     |
| gi 4529893          | HSP70-1                                                                                                           | 112 |
| gi 66360457         | Chain O, Crystal Structure Of Anthrax Edema Factor (Ef) Truncation Mutant, Ef-Delta 64 In Complex With Calmodulin | 186 |
| gi 20809886         | Tubulin, beta 2C                                                                                                  | 75  |
| gi 269784642        | BTB/POZ domain-containing protein KCTD7 isoform 2                                                                 | 81  |
| gi 111305821        | Valosin-containing protein                                                                                        | 35  |
| gi 119612249        | E3 ubiquitin protein ligase, HECT domain containing, 1, isoform CRA_a                                             | 23  |
| gi 297691739        | tubulin alpha-1B chain isoform 2                                                                                  | 42  |
| gi 3139079          | cullin 3                                                                                                          | 19  |
| gi 1147813          | desmoplakin I                                                                                                     | 23  |
| gi 18105007         | CAD protein                                                                                                       | 20  |
| gi 4502565          | calpain small subunit 1                                                                                           | 28  |
| gi 49065418         | BAG2                                                                                                              | 14  |

|              |                                                                |    |
|--------------|----------------------------------------------------------------|----|
| gi 262206280 | dnaJ homolog subfamily C member 7 isoform 1                    | 14 |
| gi 119619622 | reticulocalbin 2, EF-hand calcium binding domain               | 13 |
| gi 19111150  | angiominin isoform 2                                           | 11 |
| gi 48734966  | Eukaryotic translation elongation factor 1 alpha 1             | 15 |
| gi 15080163  | DnaJ (Hsp40) homolog, subfamily A, member 3                    | 11 |
| gi 14141152  | heterogeneous nuclear ribonucleoprotein M isoform a            | 16 |
| gi 6470150   | BiP protein, partial                                           | 24 |
| gi 119578931 | DnaJ (Hsp40) homolog, subfamily A, member 1, isoform CRA_d     | 13 |
| gi 62897075  | heat shock 70kDa protein 9B precursor variant                  | 20 |
| gi 1699027   | nuclear corepressor KAP-1                                      | 11 |
| gi 197692465 | ATP-dependent RNA helicase DDX5                                | 9  |
| gi 28277071  | Importin 5                                                     | 14 |
| gi 49168458  | DNAJB1                                                         | 9  |
| gi 42406316  | FAM29A protein, partial                                        | 9  |
| gi 20149594  | heat shock protein HSP 90-beta                                 | 12 |
| gi 71891790  | KIAA0310 protein                                               | 9  |
| gi 332808466 | 40S ribosomal protein S27-like                                 | 7  |
| gi 662841    | heat shock protein 27                                          | 13 |
| gi 197101391 | 40S ribosomal protein S3                                       | 8  |
| gi 47115317  | VIM                                                            | 6  |
| gi 48146259  | CCT2                                                           | 6  |
| gi 55962085  | centrosomal protein 170kDa                                     | 7  |
| gi 38571606  | Ribosomal protein L23                                          | 13 |
| gi 20521736  | KIAA1027 protein                                               | 6  |
| gi 119582464 | hCG1982388, isoform CRA_d                                      | 8  |
| gi 1916622   | HAX-1                                                          | 5  |
| gi 302129652 | annexin A6 isoform 2                                           | 12 |
| gi 219519019 | 5-methyltetrahydrofolate-homocysteine methyltransferase        | 7  |
| gi 62898934  | DnaJ (Hsp40) homolog, subfamily B, member 6 isoform a variant  | 7  |
| gi 3170178   | antigen NY-CO-7                                                | 7  |
| gi 119618532 | hCG2016250, isoform CRA_a                                      | 5  |
| gi 119599729 | RuvB-like 1 (E. coli)                                          | 5  |
| gi 217272894 | 116 kDa U5 small nuclear ribonucleoprotein component isoform b | 6  |
| gi 119574194 | heterogeneous nuclear ribonucleoprotein H1 (H), isoform CRA_b  | 8  |
| gi 6822170   | zinc finger protein                                            | 6  |
| gi 31873894  | hypothetical protein                                           | 9  |
| gi 33112885  | acetyl-CoA carboxylase 1                                       | 5  |
| gi 150439331 | copine I                                                       | 4  |
| gi 12275876  | tripartite motif protein TRIM27 beta                           | 5  |
| gi 49472841  | A-kinase anchor protein 8-like                                 | 6  |



|              |                                                                                                      |   |
|--------------|------------------------------------------------------------------------------------------------------|---|
| gi 15030240  | ATP synthase, H <sup>+</sup> transporting, mitochondrial F1 complex, alpha subunit 1, cardiac muscle | 5 |
| gi 119623458 | DiGeorge syndrome critical region gene 14, isoform CRA_a                                             | 5 |
| gi 62898013  | F-actin capping protein alpha-1 subunit variant                                                      | 4 |
| gi 385719194 | caseinolytic peptidase B protein homolog isoform 2                                                   | 4 |
| gi 51476906  | hypothetical protein                                                                                 | 3 |
| gi 5107666   | Chain A, Structure Of Importin Beta Bound To The Ibb Domain Of Importin Alpha                        | 4 |
| gi 4337109   | BAT3                                                                                                 | 7 |
| gi 20384797  | extracellular signal-related kinase 1c                                                               | 6 |
| gi 119594339 | damage-specific DNA binding protein 1, 127kDa, isoform CRA_a                                         | 6 |
| gi 1870688   | Bruton's tyrosine kinase-associated protein-135                                                      | 3 |
| gi 119568002 | t-complex 1, isoform CRA_b                                                                           | 5 |
| gi 62896517  | ribosomal protein S4, X-linked X isoform variant                                                     | 7 |
| gi 3088356   | ribosomal protein L38                                                                                | 5 |
| gi 68533031  | FASN variant protein                                                                                 | 3 |
| gi 15277503  | ACTB protein, partial                                                                                | 3 |
| gi 119580514 | eukaryotic translation initiation factor 3, subunit 7 zeta, 66/67kDa, isoform CRA_b                  | 5 |
| gi 14043538  | MYLK2 protein                                                                                        | 8 |
| gi 119600993 | chromosome 13 open reading frame 7, isoform CRA_b                                                    | 3 |
| gi 28175596  | FARSA protein                                                                                        | 3 |
| gi 33150546  | D-myo-inositol-3-phosphate synthase                                                                  | 3 |
| gi 119614756 | hCG2000485                                                                                           | 4 |
| gi 4507677   | endoplasmic precursor                                                                                | 5 |
| gi 62131678  | 14-3-3 protein epsilon isoform transcript variant 1                                                  | 4 |
| gi 20521013  | KIAA0360                                                                                             | 4 |
| gi 119583300 | melanoma antigen family D, 1, isoform CRA_a                                                          | 5 |
| gi 56205679  | ribosomal protein L5                                                                                 | 2 |
| gi 4757732   | apoptosis-inducing factor 1, mitochondrial isoform 1 precursor                                       | 4 |
| gi 3283882   | BDP-1 protein                                                                                        | 3 |
| gi 34782987  | CAND1 protein, partial                                                                               | 2 |
| gi 38079     | 75 kDa subunit NADH dehydrogenase precursor                                                          | 3 |
| gi 197692279 | cyclin-dependent kinase 9                                                                            | 3 |
| gi 63102091  | AMOT protein, partial                                                                                | 6 |
| gi 55960506  | chaperonin containing TCP1, subunit 3 (gamma)                                                        | 4 |
| gi 119619424 | hCG18053                                                                                             | 3 |
| gi 40788224  | KIAA0355                                                                                             | 3 |
| gi 38607488  | breast cancer-associated antigen SGA-56M                                                             | 2 |
| gi 12017959  | C1orf28                                                                                              | 2 |
| gi 21619217  | C1orf142 protein                                                                                     | 2 |
| gi 157311635 | protein FAM83H                                                                                       | 3 |

|              |                                                                       |   |
|--------------|-----------------------------------------------------------------------|---|
| gi 17391477  | Annexin A5                                                            | 5 |
| gi 119608918 | plakophilin 2, isoform CRA_b                                          | 2 |
| gi 2150046   | 26S proteasome subunit 9                                              | 2 |
| gi 1620018   | heat shock protein 90                                                 | 2 |
| gi 14424674  | CDC42 effector protein (Rho GTPase binding) 1                         | 3 |
| gi 119627021 | hook homolog 1 (Drosophila), isoform CRA_b                            | 2 |
| gi 119588620 | glutamine and serine rich 1                                           | 3 |
| gi 49456627  | CALU                                                                  | 2 |
| gi 31418053  | CCT8 protein                                                          | 2 |
| gi 189306    | nucleolin                                                             | 2 |
| gi 119584552 | IQ motif and Sec7 domain 1, isoform CRA_b                             | 2 |
| gi 114432124 | activating molecule in beclin-1-regulated autophagy                   | 2 |
| gi 1890050   | cysteine protease                                                     | 2 |
| gi 19851923  | CLL-associated antigen KW-14                                          | 2 |
| gi 13111995  | Ubiquitin associated protein 2-like                                   | 2 |
| gi 11967975  | myeloid leukemia factor 1 isoform 1                                   | 2 |
| gi 119600195 | hCG1777176, isoform CRA_b                                             | 2 |
| gi 291868    | ATPase                                                                | 2 |
| gi 119610743 | complement component 1, q subcomponent binding protein, isoform CRA_c | 2 |
| gi 5802968   | protein AF1q                                                          | 3 |
| gi 187957150 | KIAA0841                                                              | 2 |
| gi 40807091  | GANAB protein                                                         | 2 |
| gi 306890    | chaperonin (HSP60)                                                    | 3 |
| gi 119617721 | nucleosome assembly protein 1-like 1, isoform CRA_b                   | 3 |
| gi 3005758   | RNA polymerase II 140 kDa subunit                                     | 2 |
| gi 330864767 | dnaJ homolog subfamily B member 5 isoform 2                           | 5 |
| gi 62089430  | DnaJ (Hsp40) homolog, subfamily B, member 4 variant                   | 2 |
| gi 23270929  | DEAD (Asp-Glu-Ala-Asp) box polypeptide 20                             | 2 |
| gi 758423    | zinc-finger protein                                                   | 3 |
| gi 124001558 | inactive ubiquitin carboxyl-terminal hydrolase 54                     | 2 |
| gi 58257735  | KIAA0651 protein                                                      | 3 |
| gi 2209374   | HsCdc7                                                                | 2 |
| gi 119620390 | chaperonin containing TCP1, subunit 4 (delta), isoform CRA_a          | 2 |
| gi 332836269 | reticulocalbin-1                                                      | 2 |
| gi 5771523   | 3-phosphoglycerate dehydrogenase                                      | 2 |
| gi 3170190   | antigen NY-CO-25                                                      | 2 |
| gi 8885790   | filamin 2                                                             | 3 |
| gi 197692141 | ATP-dependent RNA helicase DDX3X                                      | 3 |
| gi 26051235  | nuclear pore complex protein Nup133                                   | 3 |
| gi 207029415 | histone-binding protein RBBP4 isoform b                               | 2 |

|              |                                                                                                            |   |
|--------------|------------------------------------------------------------------------------------------------------------|---|
| gi 214829673 | ADP-ribosylation factor GTPase-activating protein 3 isoform 1                                              | 2 |
| gi 226342869 | TBC1 domain family member 15 isoform 2                                                                     | 2 |
| gi 15126760  | Proteasome (prosome, macropain) 26S subunit, non-ATPase, 3                                                 | 3 |
| gi 33869643  | EEF2 protein, partial                                                                                      | 2 |
| gi 119610102 | procollagen-proline, 2-oxoglutarate 4-dioxygenase (proline 4-hydroxylase), beta polypeptide, isoform CRA_d | 2 |
| gi 62088004  | EGF-containing fibulin-like extracellular matrix protein 1 isoform b variant                               | 3 |
| gi 109389365 | glucose-6-phosphate 1-dehydrogenase isoform a                                                              | 2 |
| gi 39963074  | PRP8 pre-mRNA processing factor 8 homolog ( <i>S. cerevisiae</i> )                                         | 2 |
| gi 58761504  | HAUS augmin-like complex subunit 8 isoform a                                                               | 3 |
| gi 52545638  | hypothetical protein                                                                                       | 3 |
| gi 119570975 | ubiquinol-cytochrome c reductase core protein II, isoform CRA_a                                            | 2 |
| gi 397524998 | tescalcin isoform 1                                                                                        | 4 |
| gi 226246671 | 40S ribosomal protein S20 isoform 1                                                                        | 2 |
| gi 103471999 | serine/threonine-protein kinase 3 isoform 1                                                                | 2 |
| gi 553640    | ribosomal protein S13                                                                                      | 2 |
| gi 119570641 | hCG1994130, isoform CRA_b                                                                                  | 2 |
| gi 119611476 | centrosomal protein 350kDa, isoform CRA_a                                                                  | 2 |
| gi 5689435   | KIAA1049 protein                                                                                           | 2 |
| gi 20067381  | ALMS1 protein                                                                                              | 3 |
| gi 62897195  | glutamate dehydrogenase 1 variant                                                                          | 2 |
| gi 16876910  | HNRPF protein                                                                                              | 7 |
| gi 4885079   | ATP synthase subunit gamma, mitochondrial isoform H (heart) precursor                                      | 2 |
| gi 48146309  | DNAJB11                                                                                                    | 2 |
| gi 51094698  | MAD1 mitotic arrest deficient-like 1 (yeast)                                                               | 2 |
| gi 50949411  | hypothetical protein                                                                                       | 2 |
| gi 119617974 | PCTAIRE protein kinase 2, isoform CRA_c                                                                    | 2 |
| gi 47938913  | HYOU1 protein                                                                                              | 2 |
| gi 119608880 | hCG1979429, isoform CRA_a                                                                                  | 2 |
| gi 62548856  | BAG family molecular chaperone regulator 5 isoform a                                                       | 2 |
| gi 23242517  | Copine III                                                                                                 | 3 |
| gi 14017863  | KIAA1823 protein                                                                                           | 2 |
| gi 45861372  | 200 kDa U5 snRNP-specific spliceosomal protein                                                             | 2 |
| gi 2370178   | P73                                                                                                        | 2 |
| gi 395132436 | 60S ribosomal protein L18 isoform 2                                                                        | 2 |
| gi 21280444  | AF15q14                                                                                                    | 2 |
| gi 1419564   | cytokeratin                                                                                                | 2 |
| gi 156181166 | DnaJ                                                                                                       | 4 |
| gi 2078529   | Hlark                                                                                                      | 2 |
| gi 180928    | core protein II precursor                                                                                  | 2 |
| gi 89059026  | extracellular signal-regulated kinase-2 splice variant                                                     | 4 |

|             |                                          |   |
|-------------|------------------------------------------|---|
| gi 19353009 | Similar to Elongation factor 2b, partial | 2 |
| gi 3170190  | antigen NY-CO-25                         | 2 |

---

**Supplementary Table S2. Putative target sites of ubiquitination in CAPN1 and CAPN2 as calculated by UbiNet.**

| Serial Number | Amino Acid | Probability Score | Ubiquitination site |   |        |
|---------------|------------|-------------------|---------------------|---|--------|
| Calpain 1     |            |                   |                     |   |        |
| 1             | 461        | 0.99849           | QPAVHL              | K | RDFFLA |
| 2             | 36         | 0.664366          | RHENAI              | K | YLGQDY |
| 3             | 398        | 0.634094          | WVNPQF              | K | IRLDET |
| 4             | 564        | 0.998944          | DMEISV              | K | ELRTIL |
| 5             | 631        | 0.601169          | RKFDDL              | K | SGSMSA |
| 6             | 71         | 0.710379          | PQSLGY              | K | DLGPNS |
| 7             | 365        | 0.998614          | KSRTIR              | K | WNTTLY |
| 8             | 193        | 0.515752          | WSALLE              | K | AYAKVN |
| 9             | 197        | 0.510909          | LEKAYA              | K | VNGSYE |
| 10            | 20         | 0.577844          | VSAQVQ              | K | QRAREL |
| 11            | 626        | 0.659654          | YLSIFR              | K | FDLDKS |
| 12            | 171        | 0.608432          | DDLLPI              | K | DGKLVF |
| 13            | 240        | 0.558482          | LYQIIL              | K | ALERGS |
| 14            | 359        | 0.595199          | LTPDAL              | K | SRTIRK |
| 15            | 328        | 0.582712          | RDQLRV              | K | MEDGEF |
| 16            | 280        | 0.520307          | YSVTGA              | K | QVNYRG |
| Calpain 2     |            |                   |                     |   |        |
| 1             | 7          | 0.56294           | MAGIAA              | K | LAKDRE |
| 2             | 10         | 0.572412          | IAAKLA              | K | DREAAE |
| 3             | 26         | 0.998295          | SHDRAI              | K | YLNQDY |
| 4             | 61         | 0.582818          | PSALGF              | K | ELGPYS |
| 5             | 183        | 0.52848           | WSALLE              | K | AYAKIN |
| 6             | 280        | 0.532409          | SNGSLQ              | K | LIRIRN |
| 7             | 476        | 0.545334          | EVLNRF              | K | LPPGEY |
| 8             | 629        | 0.512513          | NSYEMR              | K | ALEEAG |
| 9             | 674        | 0.998452          | RLETLF              | K | IFKQLD |
| 10            | 677        | 0.661898          | TLFKIF              | K | QLDPEN |



**Supplementary Table S3. List of primary and secondary antibodies.**

| <b>Antibody</b>                     | <b>Supplier</b> | <b>Catalog No.</b> | <b>Dilution</b> |
|-------------------------------------|-----------------|--------------------|-----------------|
| <i>Primary Antibodies</i>           |                 |                    |                 |
| Anti-Rabbit CAPN1                   | Cell Signaling  | 2556               | WB 1:1000       |
| Anti-Rabbit CAPN2                   | Cell Signaling  | 2539               | WB 1:1000       |
| Anti-Rabbit CAPNS1                  | Sigma           | HPA006872          | WB 1:1000       |
| Anti-Rabbit CAPNS1                  | Sigma           | HPA006872          | IF 1:250        |
| Anti-Mouse CAPN1                    | Santa Cruz      | sc-390677          | WB 1:250        |
| Anti-Mouse CAPN1                    | Sigma           | C0355              | WB 1:1000       |
| Anti-Mouse CAPN2                    | Santa Cruz      | sc-373967          | WB 1:1000       |
| Anti-Mouse CAPNS1                   | Santa Cruz      | sc-32325           | WB 1:500        |
| Anti-Mouse alpha spectrin           | Millipore       | MAB1622            | WB 1:2000       |
| Anti-Rabbit p35                     | Cell Signaling  | 2680               | WB 1:1000       |
| Anti-Rabbit c-Myc                   | Sigma           | C3956              | WB 1:5000       |
| Anti-Rabbit FLAG                    | Sigma           | F7425              | WB 1:5000       |
| Anti-Mouse FLAG                     | Sigma           | F1804              | WB 1:5000       |
| Anti-Rabbit Cullin 3                | Abcam           | ab108407           | WB 1:500        |
| Anti-Mouse HA                       | BioLegend       | 901514             | WB 1:5000       |
| Anti-Rabbit KCTD7                   | ProSci Inc.     | 61-770             | WB 1:500        |
| Anti-Mouse GAPDH                    | Proteintech     | 60004-1-Ig         | WB 1:20000      |
| Anti-Mouse GFAP                     | Abcam           | ab7260             | WB 1:10000      |
| Anti-Mouse GFAP                     | Sigma           | G6171              | IF 1:500        |
| Anti-Rabbit HA-Tag (C29F4)          | Cell Signaling  | 3724S              | WB 1:1000       |
| Anti-Rabbit Sodium Potassium ATPase | Abcam           | ab76020            | WB 1:1000       |
| Anti-Rabbit Calreticulin            | Cell Signaling  | 12238              | WB 1:1000       |
| Anti-Rabbit Tom20                   | Santa Cruz      | sc-11415           | WB 1:1000       |
| Anti-Mouse Calbindin                | Swant           | 300                | IF 1:5000       |
| Anti-Mouse Calbindin                | Swant           | CB38               | IF 1:5000       |
| Anti-Rabbit GFP (D5.1)              | Cell Signaling  | 2956S              | WB 1:5000       |
| Anti-Rabbit GFP (D5.1)              | Cell Signaling  | 2956S              | IF 1:1000       |
| Anti-Rabbit Ubiquitin               | Cell Signaling  | 3933               | WB 1:1000       |
| Anti-Rabbit LAMP1 (D2D11)           | Cell Signaling  | 9091               | IF 1:250        |
| Anti-Mouse NeuN                     | Millipore       | MAB377             | IF 1:500        |
| <i>Secondary Antibodies</i>         |                 |                    |                 |
| Alexa Fluor® 488 Anti-Rat IgG       | Invitrogen      | A-11006            | 1:1000          |
| Alexa Fluor® 488 Anti-Chicken IgG   | Invitrogen      | A-11039            | 1:1000          |
| Alexa Fluor® 488 Anti-Mouse IgG     | Invitrogen      | A-21200            | 1:1000          |
| Alexa Fluor® 594 Anti-Mouse IgG     | Invitrogen      | A-21201            | 1:1000          |
| Alexa Fluor® 594 Anti-Rabbit IgG    | Invitrogen      | A-21207            | 1:1000          |

|                                 |               |            |        |
|---------------------------------|---------------|------------|--------|
| Alexa Fluor® 633 Anti-Mouse IgG | Invitrogen    | A-21052    | 1:1000 |
| Alexa Fluor® 633 Anti-Goat IgG  | Invitrogen    | A-21082    | 1:1000 |
| ECL anti-rabbit IgG-HRP         | GE Healthcare | NA9340-1ML | 1:5000 |
| ECL anti-chicken IgY-HRP        | Santa Cruz    | sc-2428    | 1:5000 |
| ECL anti-goat IgG-HRP           | Santa Cruz    | sc-2020    | 1:5000 |
| ECL anti-rat IgG-HRP            | GE Healthcare | NA9350-1ML | 1:5000 |
| ECL anti-mouse IgG-HRP          | GE Healthcare | NA9310-1ML | 1:5000 |

---

**Supplementary Table S4. Oligos used in this study.**

| <b>Primer name</b>                           | <b>Forward Primer</b>              | <b>Reverse Primer</b>               |
|----------------------------------------------|------------------------------------|-------------------------------------|
| <i>Cloning and site-directed mutagenesis</i> |                                    |                                     |
| KCTD7 WT                                     | gccggaattcaccatggtgtagtcacgggg     | ccgggtaccgccaccatgtgatcttg          |
| KCTD7 R84W                                   | ccatgttcagtgggtggcactacatcccc      | ggggatgtagtgccaccactgaacatgg        |
| KCTD7 R94W                                   | eggactccgagggctggtacttcacgac       | gtc gatgaagtaccagccctcggagtccg      |
| KCTD7 L108M                                  | cacactttggagatgtgatgaattcctgcgctca | tgagcgcaggaaattcatcacatctccaaagtgtg |
| KCTD7 D115Y                                  | cctgcgctcagggatctcccaccagg         | ccctgggtgggagataccctgagcgcagg       |
| KCTD7 R184C                                  | ccagcgggaaggcctgctttgccaagct       | agcttggcaaagcaggccttccgctgg         |
| CAPNS1                                       | cgactctagaggatccatgttctggtaactcgtt | agtcagcccgggatccggaatacatagtcagctgc |
| <i>Mouse genotyping</i>                      |                                    |                                     |
| mKCTD7_F1                                    | aacatctgtggccaaaaagc               |                                     |
| mKCTD7_R1                                    | gctggacttcagaggacac                |                                     |
| mKCTD7_F2                                    | cttgacgtgagatggaggg                |                                     |
| mKCTD7_R2                                    | ccaaagtgtgtgccatctcgatcg           |                                     |
| <i>qRT-PCR</i>                               |                                    |                                     |
| Cyclophilin                                  | ggcaaatgctggaccaaacacaa            | gtaaaatgcccgaagtcaaaag              |
| CAPN1                                        | gctggcctcatgcagaaac                | cgagggacctggtactcgc                 |
| CAPN2                                        | gagaggaggggaaggaggga               | ggaggagccctctctgaca                 |
| CAPNS1                                       | gaatgtgctcggaggcctga               | cctcgtgatggcgtaatg                  |
| KCTD7                                        | gagaacatgcagccactgaa               | tccgctccaagtggctttt                 |
